# Supplementary material for: Critical synchronization dynamics of the Kuramoto model on connectome and small world graphs
Source: PubMed Central journal article supplement (PMC6928153; doi:10.1038/s41598-019-54769-9), 2019-12-23
Supplement: 41598_2019_54769_MOESM1_ESM.pdf [file 41598_2019_54769_MOESM1_ESM.pdf]

# Supplementary information

## Critical synchronization dynamics of the Kuramoto model on connectome and small world graphs

Géza Ódor<sup>1</sup>, Jeffrey Kelling<sup>2\*</sup>

<sup>1</sup> *Institute for Technical Physics and Materials Science,  
Centre for Energy Research of the Hungarian Academy of Sciences, P.O.Box 49, H-1525 Budapest, Hungary*

<sup>2</sup> *Department of Information Services and Computing,  
Helmholtz-Zentrum Dresden - Rossendorf, P.O.Box 51 01 19, 01314 Dresden, Germany*

Here we show results for various realizations of the KKI-18-I graph to test universality. First we provide the case of the main text: 5% weight link flips, but for the fully asymmetric case: one-directional connections between nodes  $i$  and  $j$ . First we tried to estimate the transition point using the growth runs as shown on Figs S1.

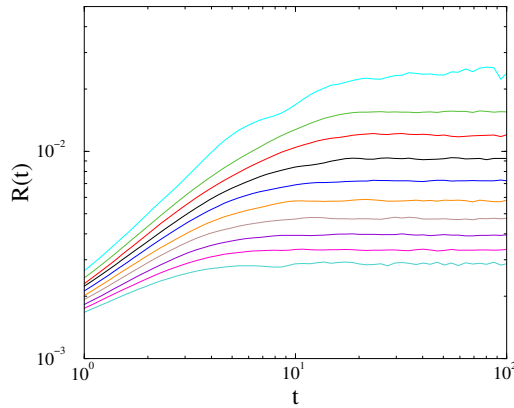

Supplementary Figure S 1: Growth of the average  $R$  on the inhibitory *KKI-18-I* graph near the synchronization transition point for:  $K = 1.3, 1.4, 1.5, 1.6, 1.7, 1.8, 1.9, 2.0, 2.1, 2.3$  (bottom to top curves).

The crossover to synchronization seems to be much smoother as before, one cannot determine it using the inflexion point criterion. The tails of the  $p(t_x)$  probability distributions exhibit PL-s with  $1 < \tau_t \leq 2$  in the  $1.3 < K < 2.1$  region. The  $\tau_t = 1$  marks the transition point, because it means a singular probability distribution. These exponent values overlap the range of experiments (see Fig. S2).

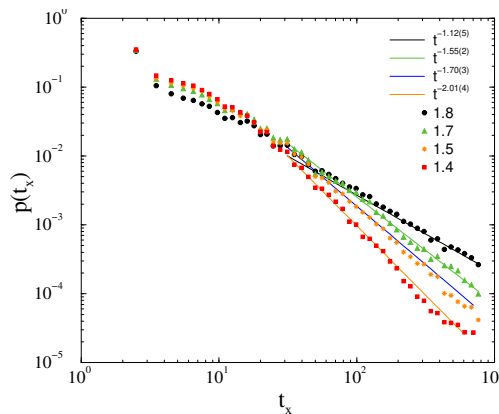

Supplementary Figure S 2: Duration distribution of  $t_x$  on the *KKI-18-I* model for growth  $K = 1.4$  (boxes),  $1.5$  (stars),  $1.7$  (triangles),  $1.8$  (bullets). The dashed line shows a PL fits to the tail region:  $t_x > 30$ .

Next we show the results for the  $R$  growth at 5% inhibited nodes without weight normalization (Fig. S3) as well as for the duration distributions (Fig. S4). As one can see this produces crossover at  $K_c \simeq 0.18$  with  $\eta_{\text{eff}} \simeq 0.23(5)$ , different from the  $\eta \simeq 0.6$  value

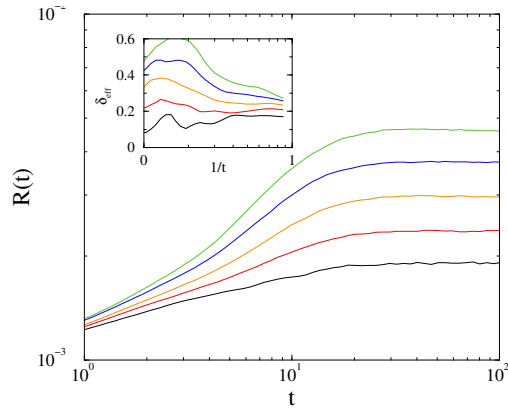

Supplementary Figure S 3: Growth of the average  $R$  on the  $KKI-18$  graph near the synchronization transition point for  $K = 0.1, 0.15, 0.17, 0.18, 0.19$  (bottom to top curves) for 5% inhibited nodes. Inset: the corresponding local slopes).

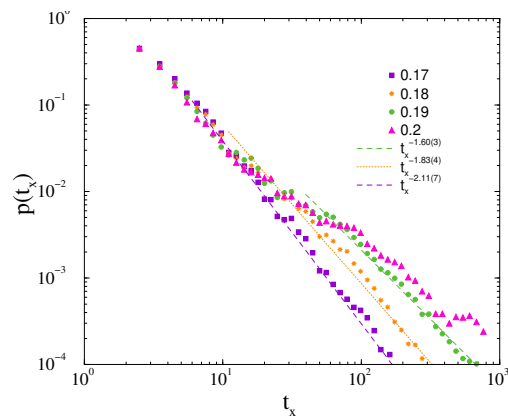

Supplementary Figure S 4: Duration distribution of  $t_x$  on the  $KKI-18-I$  model for growth  $K = 0.17$  (boxes),  $0.18$  (stars),  $0.19$  (bullets),  $0.20$  (triangles), for 20% inhibited nodes. The dashed line shows a PL fits to the tail region:  $t_x > 20$ .

We have repeated this analysis for 10 and 20% node fractions, but basically we found the same results, except from a slight shift of the non-universal transition point location. The results are summarized in the Table I.

|             | 5%      | 10%      | 20%     |
|-------------|---------|----------|---------|
| $\lambda_c$ | 0.17(1) | 0.18(1)  | 0.20(1) |
| $\eta$      | 0.23(2) | 0.23(2)  | 0.25(5) |
| $\tau_t$    | 1.6-2.2 | 1.5-2.14 | 1.8-2.3 |

TABLE I: Summary of the synchronization transition results for the  $KKI-18$  graph with different inhibited node fractions.
